# Supplementary material for: The Impact of the COVID-19 Pandemic on Pregnancy Planning Behaviors
Source: PubMed Central journal article supplement (PMC8006747; doi:10.1089/whr.2021.0005), 2021-03-23
Supplement: Supp_DataS1.pdf [file Supp_DataS1.pdf]

# Planning for pregnancy and COVID-19

\* Required

1. 1. Since filling out the Tommy's online tool are you still planning a pregnancy? \*

*Mark only one oval.*

Yes

No

2. 2. Has COVID-19 affected your plans? \*

*Mark only one oval.*

Yes

No *Skip to question 8*

## Plans affected by COVID-19

3. 3. How has COVID-19 affected your plans?

*Mark only one oval.*

I have postponed pregnancy

I have brought forward my plans for pregnancy *Skip to question 12*

I am no longer planning a pregnancy at all *Skip to question 7*

## Pregnancy postponed

## 4. Why have you chosen to postpone pregnancy?

*Check all that apply.*

- Concern about change in pregnancy care during pandemic
- Concern about the effects of the virus on yourself or your baby
- You consider yourself to be of high risk ethnicity for the virus
- You have an underlying health condition
- You are living with vulnerable family members
- Your financial situation (money) has changed
- Other - please give additional reasons below.

## 5. What are your other reasons for postponing pregnancy?

---

---

---

---

---

## 6. When do you plan to start trying again

*Mark only one oval.*

- Within 2 months      *Skip to question 13*
- 2 - 6 months      *Skip to question 13*
- 6+ months      *Skip to question 13*
- Not until a vaccine      *Skip to question 13*

No longer wish to conceive

7. How has COVID-19 caused you to decide not to try to become pregnant at all?

---

---

---

---

---

*Skip to question 13*

#### Plans unaffected by COVID-19

8. COVID-19 has not affected your plans because:

*Mark only one oval.*

- You are still trying to get pregnant *Skip to question 13*
- You are currently pregnant, have recently been pregnant or recently given birth  
*Skip to question 9*
- You have had a baby (prior to COVID-19) *Skip to question 13*
- For other reasons a baby is not on your radar *Skip to question 13*

#### Effect of COVID-19 on pregnancy

9. How has COVID-19 affected your pregnancy? (please note both good and more difficult things)

---

---

---

---

---

10. How did COVID-19 affect the birth of your baby if applicable? (please note both good and more difficult things)

---

---

---

---

---

11. How did COVID-19 affect you after your baby was born if applicable? (please note both good and more difficult things)

---

---

---

---

---

*Skip to question 13*

**Bringing plans forward**

12. Why have you brought plans for pregnancy forward?

---

---

---

---

---

**Demographics**

13. What was your age at your last birthday? \*

*Mark only one oval.*

- 18 - 24
- 25 - 34
- 35 - 40
- 41+
- Prefer not to say

14. We wish to record your weight - please state the unit you wish to record this in \*

*Mark only one oval.*

- Kilograms (Kg)     *Skip to question 15*
- Pounds     *Skip to question 16*
- Stones     *Skip to question 17*
- I prefer not to record my weight     *Skip to question 22*

Weight (Kg)

15. What is your weight now (or pre pregnancy if applicable) in Kg? \*

---

*Skip to question 18*

Weight (Lbs)

16. What is your weight now (or pre pregnancy if applicable) in Pounds

---

*Skip to question 18*

Weight (Stone)

17. What is your weight now (or pre pregnancy if applicable) in Stones

---

Height

18. We wish to record your height - which unit do you wish to record this in? \*

*Mark only one oval.*

- Centimeters      *Skip to question 19*
- Feet and inches      *Skip to question 20*
- I prefer not to record my height      *Skip to question 22*

Height (Cm)

19. What is your height in Centimetres (cm)? \*

---

*Skip to question 22*

Height (Ft, Inch)

20. What is your height in Feet

---

21. and inches

---

Demographics cont.

22. What ethnic group do you belong to? \*

*Mark only one oval.*

- Black
- Asian
- White
- Mixed
- Other
- prefer not to say

23. What is your highest educational achievement? \*

*Mark only one oval.*

- None
- GCSE or equivalent
- A level or equivalent
- Degree or equivalent
- prefer not to say

24. In which Country do you live \*

*Mark only one oval.*

- Prefer not to say
- England
- Scotland
- Ireland (Republic)
- Northern Ireland
- Wales
- Afghanistan
- Albania
- Algeria
- Andorra
- Angola
- Antigua & Deps
- Argentina
- Armenia
- Australia
- Austria
- Azerbaijan
- Bahamas
- Bahrain
- Bangladesh
- Barbados
- Belarus
- Belgium
- Belize
- Benin
- Bhutan
- Bolivia
- Bosnia Herzegovina
- Botswana
- Brazil
- Brunei
- Bulgaria



- Burkina
- Burundi
- Cambodia
- Cameroon
- Canada
- Cape Verde
- Central African Rep
- Chad
- Chile
- China
- Colombia
- Congo
- Congo (Democratic Rep)
- Costa Rica
- Croatia
- Cuba
- Cyprus
- Czech Republic
- Denmark
- Djibouti
- Dominica
- Dominican Republic
- East Timor
- Ecuador
- Egypt
- El Salvador
- Equatorial Guinea
- Eritrea
- Estonia
- Ethiopia
- Fiji
- Finland
- France
- Gabon
- Gambia

- Georgia
- Germany
- Ghana
- Greece
- Grenada
- Guatemala
- Guinea
- Guinea-Bissau
- Guyana
- Haiti
- Honduras
- Hungary
- Iceland
- India
- Indonesia
- Iran
- Iraq
- Israel
- Italy
- Ivory Coast
- Jamaica
- Japan
- Jordan
- Kazakhstan
- Kenya
- Kiribati
- Korea North
- Korea South
- Kosovo
- Kuwait
- Kyrgyzstan
- Laos
- Latvia
- Lebanon
- Lesotho

- Liberia
- Libya
- Liechtenstein
- Lithuania
- Luxembourg
- Macedonia
- Madagascar
- Malawi
- Malaysia
- Maldives
- Mali
- Malta
- Marshall Islands
- Mauritania
- Mauritius
- Mexico
- Micronesia
- Moldova
- Monaco
- Mongolia
- Montenegro
- Morocco
- Mozambique
- Myanmar (Burma)
- Namibia
- Nauru
- Nepal
- Netherlands
- New Zealand
- Nicaragua
- Niger
- Nigeria
- Norway
- Oman
- Pakistan

- Palau
- Panama
- Papua New Guinea
- Paraguay
- Peru
- Philippines
- Poland
- Portugal
- Qatar
- Romania
- Russian Federation
- Rwanda
- St Kitts & Nevis
- St Lucia
- Saint Vincent & the Grenadines
- Samoa
- San Marino
- Sao Tome & Principe
- Saudi Arabia
- Senegal
- Serbia
- Seychelles
- Sierra Leone
- Singapore
- Slovakia
- Slovenia
- Solomon Islands
- Somalia
- South Africa
- South Sudan
- Spain
- Sri Lanka
- Sudan
- Suriname
- Swaziland

- Sweden
- Switzerland
- Syria
- Taiwan
- Tajikistan
- Tanzania
- Thailand
- Togo
- Tonga
- Trinidad & Tobago
- Tunisia
- Turkey
- Turkmenistan
- Tuvalu
- Uganda
- Ukraine
- United Arab Emirates
- United States
- Uruguay
- Uzbekistan
- Vanuatu
- Vatican City
- Venezuela
- Vietnam
- Yemen
- Zambia
- Zimbabwe

---

This content is neither created nor endorsed by Google.

Google Forms
